# Supplementary material for: The Antibacterial Activity of Human Amniotic Membrane against Multidrug-Resistant Bacteria Associated with Urinary Tract Infections: New Insights from Normal and Cancerous Urothelial Models
Source: MDPI journal article supplement (doi:10.3390/biomedicines9020218), 2021-02-20
Supplement: s1 [file s1]

## **Supplementary Material**

### **The Antibacterial Activity of Human Amniotic Membrane against Multidrug-Resistant Bacteria Associated with Urinary Tract Infections: New Insights from Normal and Cancerous Urothelial Models**

**Taja Železnik Ramuta<sup>1</sup>, Larisa Tratnjek<sup>1</sup>, Aleksandar Janev<sup>1</sup>, Katja Seme<sup>2</sup>, Marjanca Starčič Erjavec<sup>3\*</sup>, Mateja Erdani Kreft<sup>1\*</sup>**

<sup>1</sup> Institute of Cell Biology, Faculty of Medicine, University of Ljubljana, Ljubljana, Slovenia

<sup>2</sup> Institute of Immunology and Microbiology, Faculty of Medicine, University of Ljubljana, Ljubljana, Slovenia

<sup>3</sup> Department of Biology, Biotechnical Faculty, University of Ljubljana, Ljubljana, Slovenia

\*Correspondence: marjanca.starcic.erjavec@bf.uni-lj.si (M.S.E.); mateja.erdani@mf.uni-lj.si (M.E.K.)

**Supplementary Table 1.** The analysis of variance (ANOVA) of the antimicrobial effect of f-hAM and c-hAM homogenates for all susceptible strains. The parametric one-way ANOVA with post-hoc Tukey's multiple comparisons test was used when there were more than 20 measurements per condition and the data followed normal distribution (all analyses for reference and clinical strains of MRSA). The non-parametric Kruskal-Wallis test with post-hoc Dunn's multiple comparisons test was used when there were 6-20 measurements per condition and the data followed normal distribution (all analyses for reference and clinical strains of *A. baumannii*, ESBL-producing *E. coli* and ESBL-producing *K. pneumoniae*).  $p < 0.05$  values were considered statistically significant.

| Analysis of variance (ANOVA)                                                                                |                  |
|-------------------------------------------------------------------------------------------------------------|------------------|
| Tukey's multiple comparisons test                                                                           | Adjusted P Value |
| MRSA (reference strain) + 5 µl of f-hAM homogenate vs. MRSA (reference strain) + 10 µl of f-hAM homogenate  | 0.2299           |
| MRSA (reference strain) + 5 µl of f-hAM homogenate vs. MRSA (clinical strain) + 5 µl of f-hAM homogenate    | 0.9904           |
| MRSA (reference strain) + 5 µl of f-hAM homogenate vs. MRSA (clinical strain) + 10 µl of f-hAM homogenate   | 0.0035           |
| MRSA (reference strain) + 5 µl of f-hAM homogenate vs. MRSA (reference strain) + 5 µl of c-hAM homogenate   | 0.9881           |
| MRSA (reference strain) + 5 µl of f-hAM homogenate vs. MRSA (reference strain) + 10 µl of c-hAM homogenate  | 0.0144           |
| MRSA (reference strain) + 5 µl of f-hAM homogenate vs. MRSA (clinical strain) + 5 µl of c-hAM homogenate    | 0.9964           |
| MRSA (reference strain) + 5 µl of f-hAM homogenate vs. MRSA (clinical strain) + 10 µl of c-hAM homogenate   | 0.0007           |
| MRSA (reference strain) + 10 µl of f-hAM homogenate vs. MRSA (clinical strain) + 5 µl of f-hAM homogenate   | 0.7549           |
| MRSA (reference strain) + 10 µl of f-hAM homogenate vs. MRSA (clinical strain) + 10 µl of f-hAM homogenate  | 0.8398           |
| MRSA (reference strain) + 10 µl of f-hAM homogenate vs. MRSA (reference strain) + 5 µl of c-hAM homogenate  | 0.7732           |
| MRSA (reference strain) + 10 µl of f-hAM homogenate vs. MRSA (reference strain) + 10 µl of c-hAM homogenate | 0.9695           |
| MRSA (reference strain) + 10 µl of f-hAM homogenate vs. MRSA (clinical strain) + 5 µl of c-hAM homogenate   | 0.6765           |
| MRSA (reference strain) + 10 µl of f-hAM homogenate vs. MRSA (clinical strain) + 10 µl of c-hAM homogenate  | 0.5925           |
| MRSA (clinical strain) + 5 µl of f-hAM homogenate vs. MRSA (clinical strain) + 10 µl of f-hAM homogenate    | 0.0546           |
| MRSA (clinical strain) + 5 µl of f-hAM homogenate vs. MRSA (reference strain) + 5 µl of c-hAM homogenate    | > 0.9999         |
| MRSA (clinical strain) + 5 µl of f-hAM homogenate vs. MRSA (reference strain) + 10 µl of c-hAM homogenate   | 0.1535           |
| MRSA (clinical strain) + 5 µl of f-hAM homogenate vs. MRSA (clinical strain) + 5 µl of c-hAM homogenate     | > 0.9999         |
| MRSA (clinical strain) + 5 µl of f-hAM homogenate vs. MRSA (clinical strain) + 10 µl of c-hAM homogenate    | 0.016            |
| MRSA (clinical strain) + 10 µl of f-hAM homogenate vs. MRSA (reference strain) + 5 µl of c-hAM homogenate   | 0.0596           |
| MRSA (clinical strain) + 10 µl of f-hAM homogenate vs. MRSA (reference strain) + 10 µl of c-hAM homogenate  | > 0.9999         |
| MRSA (clinical strain) + 10 µl of f-hAM homogenate vs. MRSA (clinical strain) + 5 µl of c-hAM homogenate    | 0.0382           |

|                                                                                                                                                          |                         |
|----------------------------------------------------------------------------------------------------------------------------------------------------------|-------------------------|
| MRSA (clinical strain) + 10 µl of f-hAM homogenate vs. MRSA (clinical strain) + 10 µl of c-hAM homogenate                                                | > 0.9999                |
| MRSA (reference strain) + 5 µl of c-hAM homogenate vs. MRSA (reference strain) + 10 µl of c-hAM homogenate                                               | 0.1647                  |
| MRSA (reference strain) + 5 µl of c-hAM homogenate vs. MRSA (clinical strain) + 5 µl of c-hAM homogenate                                                 | > 0.9999                |
| MRSA (reference strain) + 5 µl of c-hAM homogenate vs. MRSA (clinical strain) + 10 µl of c-hAM homogenate                                                | 0.0177                  |
| MRSA (reference strain) + 10 µl of c-hAM homogenate vs. MRSA (clinical strain) + 5 µl of c-hAM homogenate                                                | 0.1142                  |
| MRSA (reference strain) + 10 µl of c-hAM homogenate vs. MRSA (clinical strain) + 10 µl of c-hAM homogenate                                               | 0.9924                  |
| MRSA (clinical strain) + 5 µl of c-hAM homogenate vs. MRSA (clinical strain) + 10 µl of c-hAM homogenate                                                 | 0.0106                  |
| <b>Dunn's multiple comparisons test</b>                                                                                                                  | <b>Adjusted P Value</b> |
| <i>A. baumannii</i> (reference strain) + 5 µl of f-hAM homogenate vs. <i>A. baumannii</i> (reference strain) + 10 µl of f-hAM homogenate                 | > 0.9999                |
| <i>A. baumannii</i> (reference strain) + 5 µl of f-hAM homogenate vs. <i>A. baumannii</i> (clinical strain) + 5 µl of f-hAM homogenate                   | 0.0009                  |
| <i>A. baumannii</i> (reference strain) + 5 µl of f-hAM homogenate vs. <i>A. baumannii</i> (clinical strain) + 10 µl of f-hAM homogenate                  | > 0.9999                |
| <i>A. baumannii</i> (reference strain) + 5 µl of f-hAM homogenate vs. ESBL-producing <i>E. coli</i> (clinical strain) + 5 µl of f-hAM homogenate         | 0.0346                  |
| <i>A. baumannii</i> (reference strain) + 5 µl of f-hAM homogenate vs. ESBL-producing <i>E. coli</i> (clinical strain) + 10 µl of f-hAM homogenate        | > 0.9999                |
| <i>A. baumannii</i> (reference strain) + 5 µl of f-hAM homogenate vs. ESBL-producing <i>K. pneumoniae</i> (reference strain) + 5 µl of f-hAM homogenate  | 0.0372                  |
| <i>A. baumannii</i> (reference strain) + 5 µl of f-hAM homogenate vs. ESBL-producing <i>K. pneumoniae</i> (reference strain) + 10 µl of f-hAM homogenate | > 0.9999                |
| <i>A. baumannii</i> (reference strain) + 5 µl of f-hAM homogenate vs. ESBL-producing <i>K. pneumoniae</i> (clinical strain) + 5 µl of f-hAM homogenate   | 0.0043                  |
| <i>A. baumannii</i> (reference strain) + 5 µl of f-hAM homogenate vs. ESBL-producing <i>K. pneumoniae</i> (clinical strain) + 10 µl of f-hAM homogenate  | > 0.9999                |
| <i>A. baumannii</i> (reference strain) + 5 µl of f-hAM homogenate vs. <i>A. baumannii</i> (reference strain) + 5 µl of c-hAM homogenate                  | > 0.9999                |
| <i>A. baumannii</i> (reference strain) + 5 µl of f-hAM homogenate vs. <i>A. baumannii</i> (reference strain) + 10 µl of c-hAM homogenate                 | > 0.9999                |
| <i>A. baumannii</i> (reference strain) + 5 µl of f-hAM homogenate vs. <i>A. baumannii</i> (clinical strain) + 5 µl of c-hAM homogenate                   | 0.0002                  |
| <i>A. baumannii</i> (reference strain) + 5 µl of f-hAM homogenate vs. <i>A. baumannii</i> (clinical strain) + 10 µl of c-hAM homogenate                  | > 0.9999                |
| <i>A. baumannii</i> (reference strain) + 5 µl of f-hAM homogenate vs. ESBL-producing <i>E. coli</i> (clinical strain) + 5 µl of c-hAM homogenate         | 0.01                    |
| <i>A. baumannii</i> (reference strain) + 5 µl of f-hAM homogenate vs. ESBL-producing <i>E. coli</i> (clinical strain) + 10 µl of c-hAM homogenate        | > 0.9999                |
| <i>A. baumannii</i> (reference strain) + 5 µl of f-hAM homogenate vs. ESBL-producing <i>K. pneumoniae</i> (reference strain) + 5 µl of c-hAM homogenate  | 0.0043                  |
| <i>A. baumannii</i> (reference strain) + 5 µl of f-hAM homogenate vs. ESBL-producing <i>K. pneumoniae</i> (reference strain) + 10 µl of c-hAM homogenate | > 0.9999                |
| <i>A. baumannii</i> (reference strain) + 5 µl of f-hAM homogenate vs. ESBL-producing <i>K. pneumoniae</i> (clinical strain) + 5 µl of c-hAM homogenate   | 0.0008                  |
| <i>A. baumannii</i> (reference strain) + 5 µl of f-hAM homogenate vs. ESBL-producing <i>K. pneumoniae</i> (clinical strain) + 10 µl of c-hAM homogenate  | > 0.9999                |
| <i>A. baumannii</i> (reference strain) + 10 µl of f-hAM homogenate vs. <i>A. baumannii</i> (clinical strain) + 5 µl of f-hAM homogenate                  | < 0.0001                |

[illegible]

[illegible]

[illegible]

[illegible]

[illegible]



[illegible]

|                                                                                                                                                                          |          |
|--------------------------------------------------------------------------------------------------------------------------------------------------------------------------|----------|
| ESBL-producing <i>K. pneumoniae</i> (reference strain) + 10 µl of c-hAM homogenate vs. ESBL-producing <i>K. pneumoniae</i> (clinical strain) + 10 µl of c-hAM homogenate | > 0.9999 |
| ESBL-producing <i>K. pneumoniae</i> (clinical strain) + 5 µl of c-hAM homogenate vs. ESBL-producing <i>K. pneumoniae</i> (clinical strain) + 10 µl of c-hAM homogenate   | > 0.9999 |
